# Supplementary figures and images for: Ecological adaptation determines functional mammalian olfactory subgenomes
Source: HighWire-hosted journal article supplement (doi:10.1101/gr.099416.109), 2009-12-01

## OR family 2/13

Parsimony reconstruction  
[Squared length: 0.14079167]

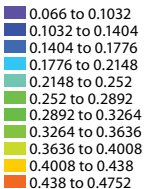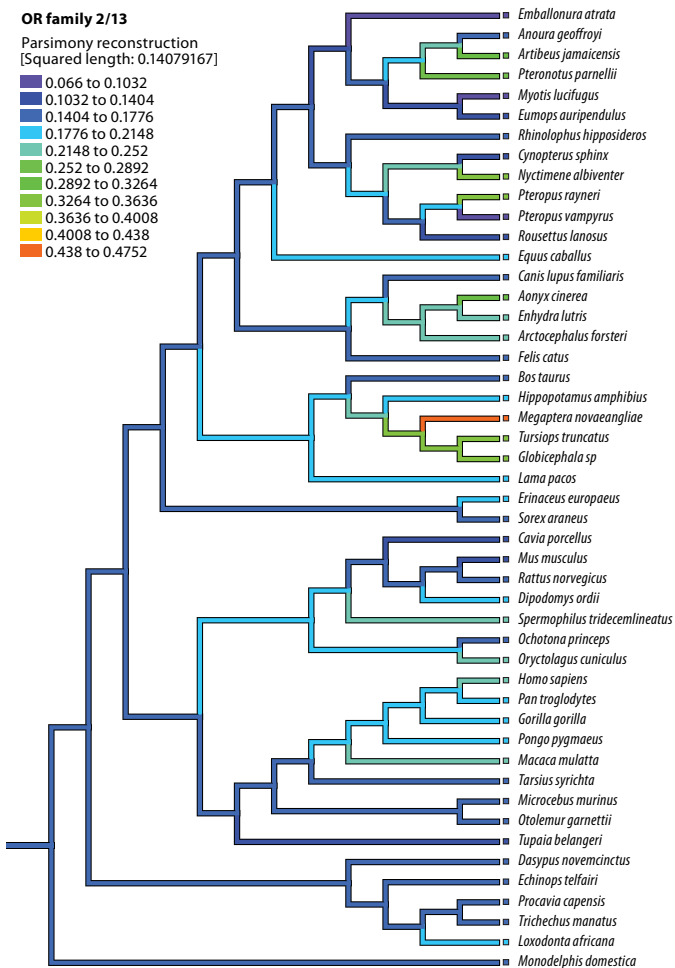

Supplement: Hayden_099416_FigS7.ai.pdf [file Hayden_099416_FigS7.ai.pdf]
